# Supplementary material for: Domain expert evaluation of advanced visual computing solutions for the planning of left atrial appendage occluder interventions
Source: bioRxiv or medRxiv preprint supplement (doi:10.1101/2022.04.11.22273553), 2022-04-16
Supplement: Supplementary file [file media-1.pdf]

## SUPPLEMENTARY MATERIAL

### Appendix A: SUS questionnaire

1. I think that I would like to use this system frequently

| Strongly agree | Agree | More or less agree | Undecided | More or less disagree | Disagree | Strongly disagree |
|----------------|-------|--------------------|-----------|-----------------------|----------|-------------------|
|                |       |                    |           |                       |          |                   |

2. I found the system unnecessarily complex

| Strongly agree | Agree | More or less agree | Undecided | More or less disagree | Disagree | Strongly disagree |
|----------------|-------|--------------------|-----------|-----------------------|----------|-------------------|
|                |       |                    |           |                       |          |                   |

3. I thought the system was easy to use

| Strongly agree | Agree | More or less agree | Undecided | More or less disagree | Disagree | Strongly disagree |
|----------------|-------|--------------------|-----------|-----------------------|----------|-------------------|
|                |       |                    |           |                       |          |                   |

4. I think that I would need the support to use this system

| Strongly agree | Agree | More or less agree | Undecided | More or less disagree | Disagree | Strongly disagree |
|----------------|-------|--------------------|-----------|-----------------------|----------|-------------------|
|                |       |                    |           |                       |          |                   |

5. I found the various functions in this system were well integrated

| Strongly agree | Agree | More or less agree | Undecided | More or less disagree | Disagree | Strongly disagree |
|----------------|-------|--------------------|-----------|-----------------------|----------|-------------------|
|                |       |                    |           |                       |          |                   |

6. I thought there was too much inconsistency in this system

| Strongly agree | Agree | More or less agree | Undecided | More or less disagree | Disagree | Strongly disagree |
|----------------|-------|--------------------|-----------|-----------------------|----------|-------------------|
|                |       |                    |           |                       |          |                   |

7. I would imagine that most people would learn to use this system very quickly

| Strongly agree | Agree | More or less agree | Undecided | More or less disagree | Disagree | Strongly disagree |
|----------------|-------|--------------------|-----------|-----------------------|----------|-------------------|
|                |       |                    |           |                       |          |                   |

|  |  |  |  |  |  |  |
|--|--|--|--|--|--|--|
|  |  |  |  |  |  |  |
|--|--|--|--|--|--|--|

8. I found the system very cumbersome to use

|                |       |                    |           |                       |          |                   |
|----------------|-------|--------------------|-----------|-----------------------|----------|-------------------|
| Strongly agree | Agree | More or less agree | Undecided | More or less disagree | Disagree | Strongly disagree |
|                |       |                    |           |                       |          |                   |

9. I felt very confident using the system

|                |       |                    |           |                       |          |                   |
|----------------|-------|--------------------|-----------|-----------------------|----------|-------------------|
| Strongly agree | Agree | More or less agree | Undecided | More or less disagree | Disagree | Strongly disagree |
|                |       |                    |           |                       |          |                   |

10. I needed to learn a lot of things before I could get going with this system

|                |       |                    |           |                       |          |                   |
|----------------|-------|--------------------|-----------|-----------------------|----------|-------------------|
| Strongly agree | Agree | More or less agree | Undecided | More or less disagree | Disagree | Strongly disagree |
|                |       |                    |           |                       |          |                   |

## Appendix B: SUS questionnaire results

|     | VIDAA          | VRIDAA         | 3D Printing    | Simulations    |
|-----|----------------|----------------|----------------|----------------|
| Q1  | 5.0/6.0        | 3.2/6.0        | 4.5/6.0        | 4.5/6.0        |
| Q2  | <b>5.3/6.0</b> | 4.7/6.0        | 4.8/6.0        | 3.0/6.0        |
| Q3  | <b>5.3/6.0</b> | <b>5.1/6.0</b> | <b>5.5/6.0</b> | <b>2.8/6.0</b> |
| Q4  | 4.0/6.0        | 3.1/6.0        | <b>5.2/6.0</b> | <b>2.5/6.0</b> |
| Q5  | 4.3/6.0        | <b>2.8/6.0</b> | <b>2.8/6.0</b> | 4.6/6.0        |
| Q6  | 4.6/6.0        | 4.0/6.0        | 3.0/6.0        | 4.5/6.0        |
| Q7  | <b>5.5/6.0</b> | 4.7/6.0        | <b>5.6/6.0</b> | 3.0/6.0        |
| Q8  | 5.0/6.0        | 4.7/6.0        | <b>5.3/6.0</b> | 3.2/6.0        |
| Q9  | 5.0/6.0        | 4.7/6.0        | 4.0/6.0        | 4.0/6.0        |
| Q10 | 4.0/6.0        | 4.3/6.0        | 5.0/6.0        | 4.2/6.0        |

**Table 1:** The SUS average results obtained in each the question from the 6 participants. Maximum value obtained per question was 6.
